# Supplementary material for: “Smart” theranostic lanthanide nanoprobes with simultaneous up-conversion fluorescence and tunable T1–T2 magnetic resonance imaging contrast and near-infrared activated photodynamic therapy
Source: Royal Society of Chemistry journal article supplement (doi:10.1039/c4nr01717j), 2014-01-01
Supplement: c4nr01717j1.pdf [file c4nr01717j1.pdf]

**Electronic Supplementary Information of:**

**“Smart” Theranostic Lanthanide Nanoprobes with Simultaneous  
Up-conversion Fluorescence and Tunable T<sub>1</sub>-T<sub>2</sub> Magnetic Resonance  
Imaging Contrast and Near-Infrared Activated Photodynamic  
Therapy**

Yan Zhang,<sup>a</sup> Gautom Kumar Das,<sup>a</sup> Vimalan Vijayaragavan,<sup>b</sup> Qing Chi Xu,<sup>a</sup>

Parasuraman Padmanabhan,<sup>c</sup> Kishore K. Bhakoo,<sup>b</sup> Subramanian Tamil Selvan<sup>d</sup> and

Timothy Thatt Yang Tan<sup>a\*</sup>

<sup>a</sup> School of Chemical and Biomedical Engineering, Nanyang Technological  
University, 62 Nanyang Drive, Singapore 637459

<sup>b</sup> Translational Molecular Imaging Group, Singapore Bioimaging Consortium, Helios  
Building, 11 Biopolis Way, Singapore 138667

<sup>c</sup> The Lee Kong Chian School of Medicine, Nanyang Technological University, 50  
Nanyang Drive, Research Techno Plaza, Level 4, X-Frontier Block, Singapore  
637553.

<sup>d</sup>Institute of Materials Research and Engineering, 3 Research Link, Singapore 117602.

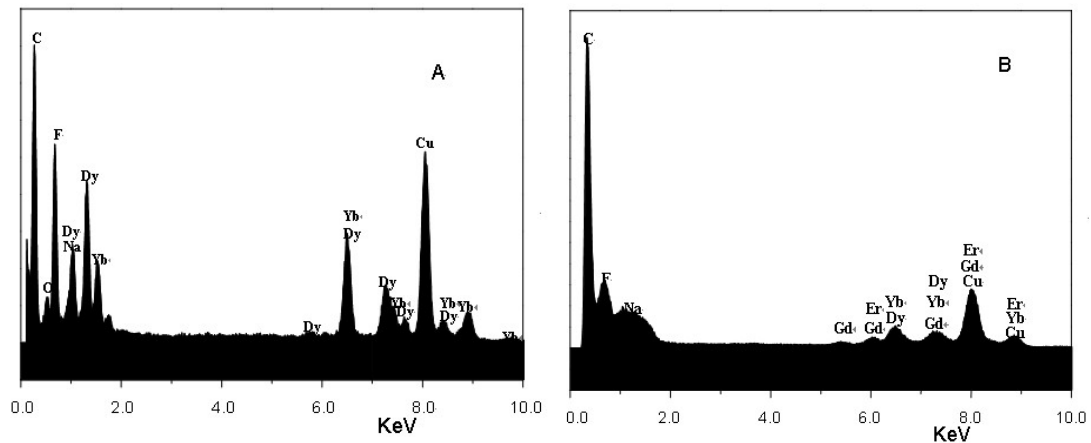

Fig. S1. Energy-dispersive X-ray spectroscopy (EDX) analysis of (A)  $\text{NaDyF}_4:\text{Yb}^{3+}$  and (B)  $\text{NaDyF}_4:\text{Yb}^{3+}/\text{NaGdF}_4:\text{Yb}^{3+},\text{Er}^{3+}$  NCs, revealing the presence of the Gd, Er after secondary growth on the  $\text{NaDyF}_4:\text{Yb}^{3+}$  seeds NCs.

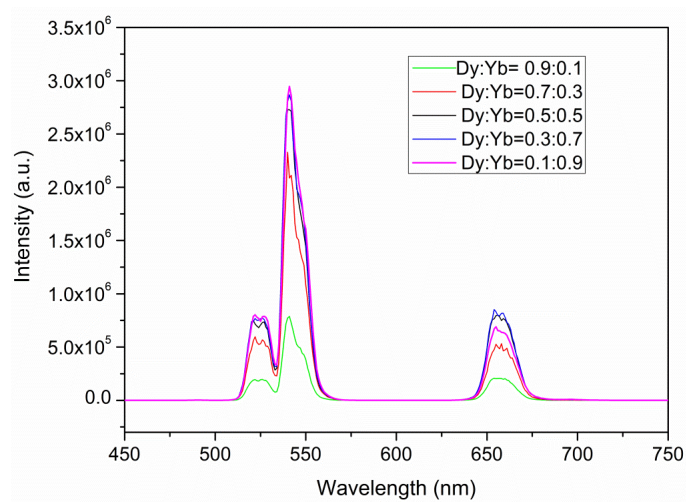

Fig. S2. The effect of different doping concentration of  $\text{Yb}^{3+}$  in the  $\text{NaDyF}_4:\text{Yb}^{3+}$  towards the overall  $\text{NaDyF}_4:\text{Yb}^{3+}/\text{NaGdF}_4:\text{Yb}^{3+},\text{Er}^{3+}$  fluorescent intensity. All samples were dispersed in chloroform (1 mg/ml), spectra were recorded at a power of 1 W.

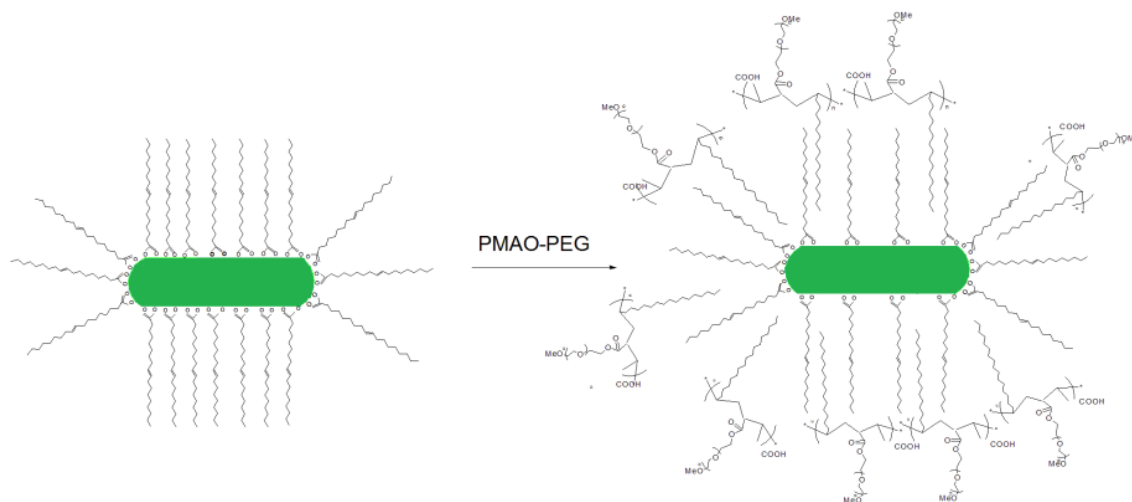

Fig. S3. Schematic representation of the intercalated NCs via PMAO-PEG.

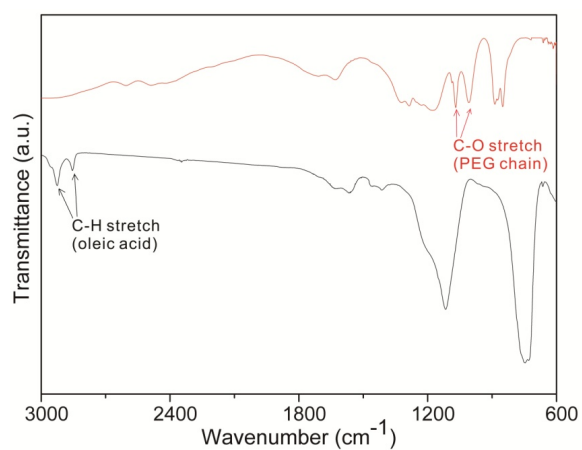

Fig. S4. FTIR spectra of functionalized  $\text{NaDyF}_4:\text{Yb}^{3+}/\text{NaGdF}_4:\text{Yb}^{3+},\text{Er}^{3+}$  NCs. The result shows that peak intensity at  $2880\text{ cm}^{-1}$  and  $2820\text{ cm}^{-1}$  increase, which is ascribed to the C-H stretch in oleic acid. The strong peak at  $1100\text{ cm}^{-1}$  corresponds to C-O bonds in the PEG backbone.

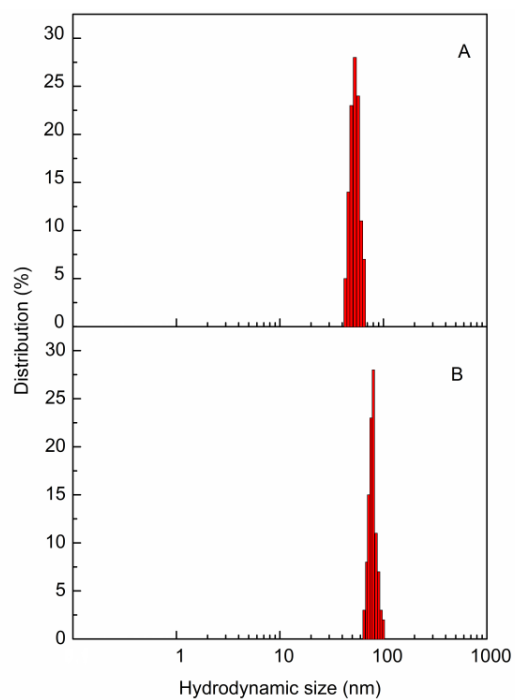

Fig. S5. Hydrodynamic size of nanocrystals: oleic acid-coated NCs (A), PMAO-PEG-NCs in DI water (B). The sizes of A and B in water were determined to be 56 nm and 84 nm, respectively. The size increase (~28 nm) is attributed to the PEG coating.

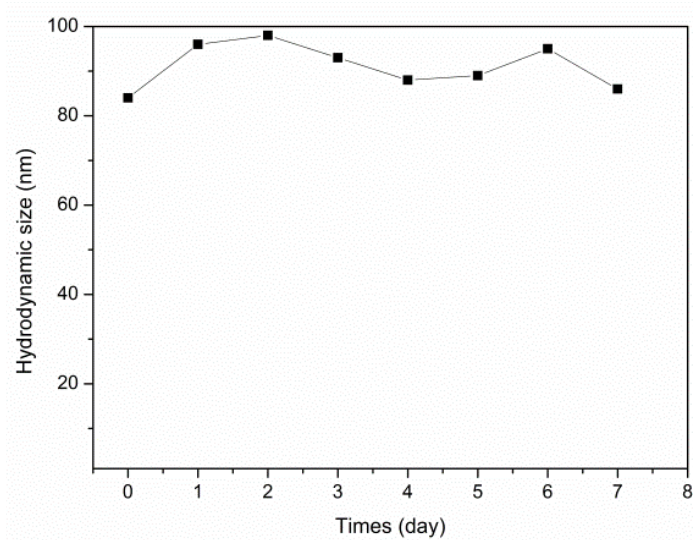

Fig. S6 Size variation of PMAO-PEG-NCs obtained by DLS. No significant size change was observed up to 7 days, demonstrating the excellent colloidal stability of the PMAO-PEG functionalized nanocrystals.

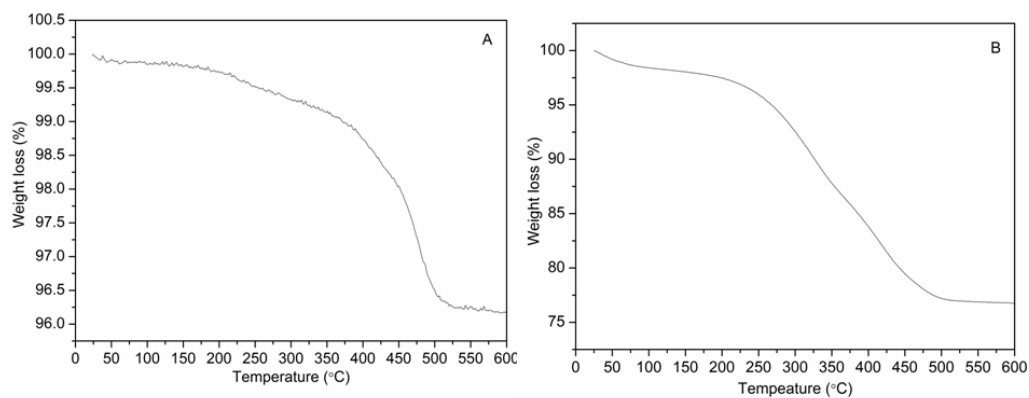

Fig. S7. Thermogravimetric analysis curves for oleic-acid capped NCs (A) and PMAO-PEG-NCs (B). The weight fraction of before and after the polymer coating of the NCs showed 19% weight loss due to the polymer.

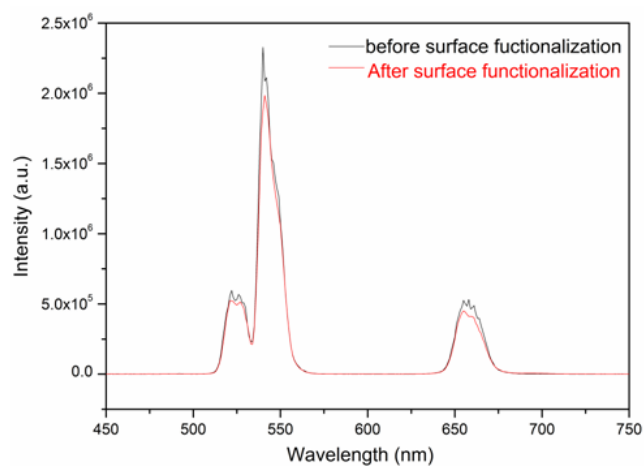

Fig. S8. UC emission of the  $\text{NaDyF}_4:\text{Yb}^{3+}/\text{NaGdF}_4:\text{Yb}^{3+},\text{Er}^{3+}$  NCs before and after surface coating. Samples concentration is 1 mg/ml and spectra were recorded at a power of 1 W.

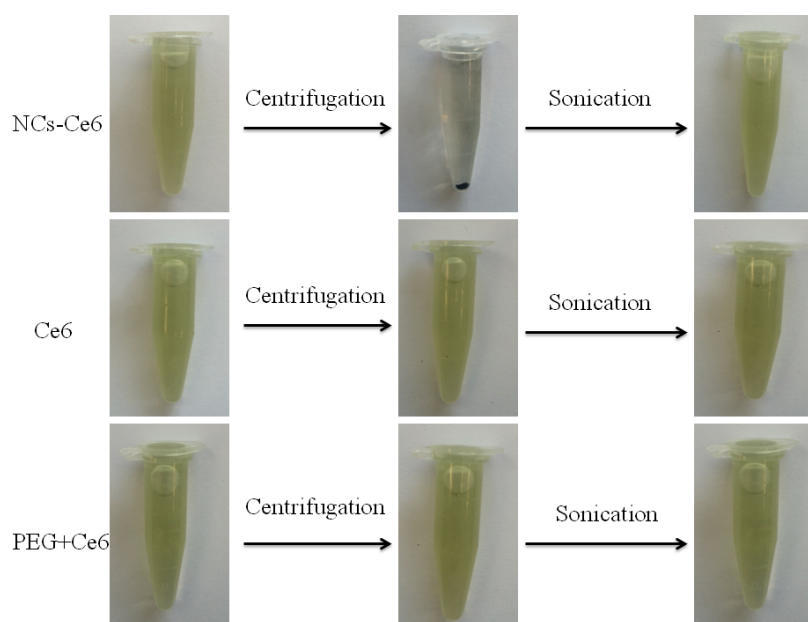

Fig. S9. Photos of NCs-Ce6, Free Ce6, and PEG-Ce6 solutions after centrifugation and then sonication.

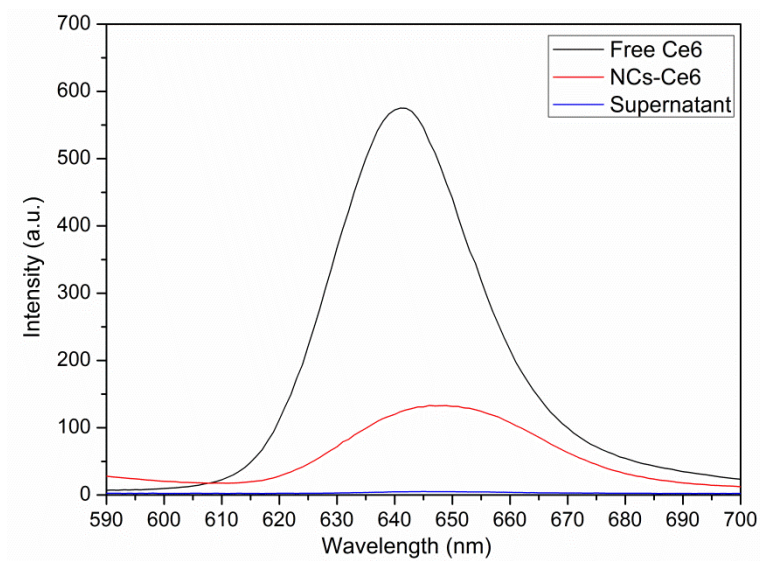

Fig. S10. Fluorescence spectra of free Ce6, NCs-Ce6 and the supernatant, measured under 400 nm excitation.

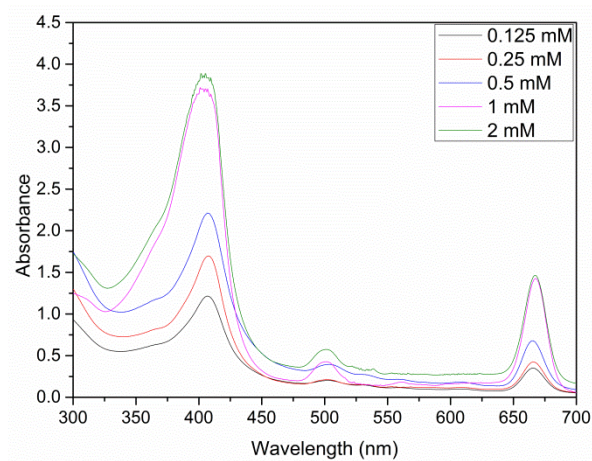

Fig. S11. UV-vis absorbance spectra of NCs-Ce6 loaded with different concentration of Ce6. Concentration of NCs in samples kept the same.

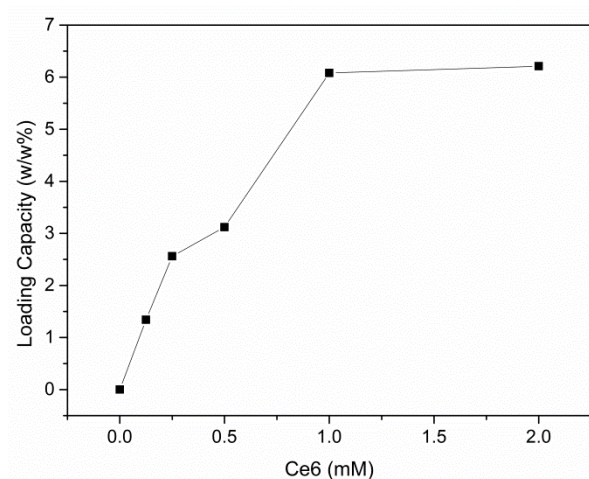

Fig. S12. Loading capacity of Ce6 of NCs-Ce6 at different Ce6 concentration.

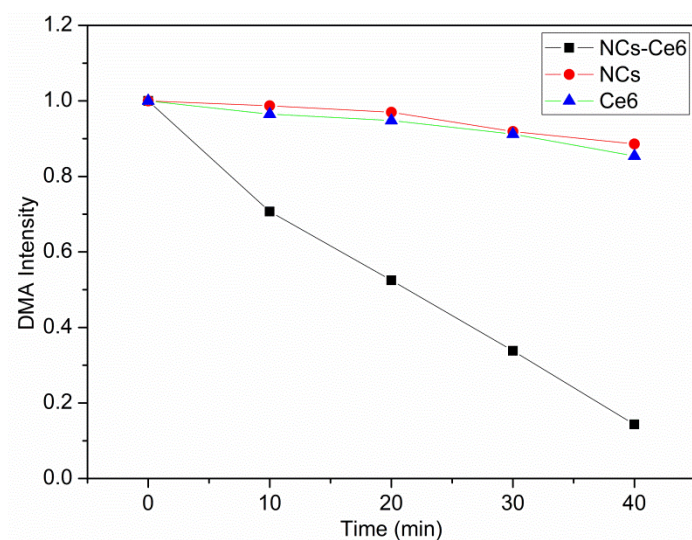

Fig. S13. Normalized change of DMA fluorescence from NCs-Ce6, bare NCs and pure Ce6 as a result of singlet oxygen generation under 980 nm irradiation.



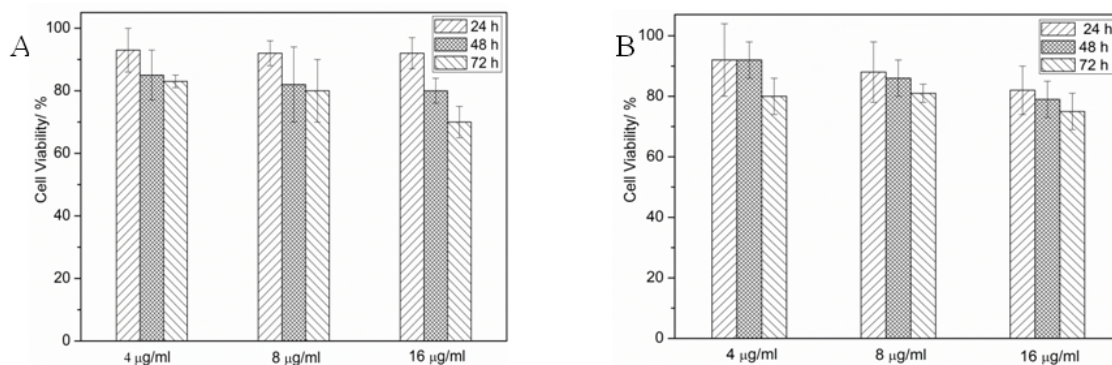

Fig. S14. Cell viability of HeLa cells incubated with different concentration of (A) NCs and (B) NCs-Ce6 at 24 h, 48 h, 72 h at 37 °C.

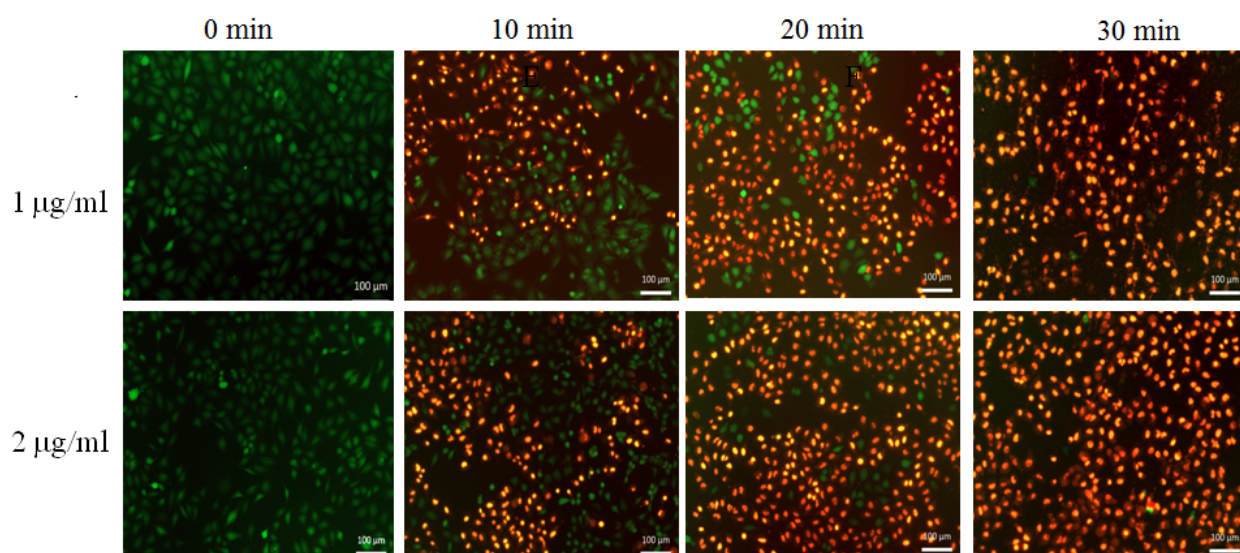

Fig. S15. Detection of photodamage by fluorescence microscopy using fluorescent probes at the NCs-Ce6 concentration of 1 µg/ml (top row) and 2 µg/ml (bottom row) at time of 0 min, 10 min, 20 min, 30 min, respectively (double-staining with calcein-AM and ethidium homodimer). Dead cells: red fluorescence of ethidium homodimer; live cells: green fluorescence of calcein-AM.
